# Supplementary figures and images for: Rapid Determination of Geniposide and Baicalin in Lanqin Oral Solution by Near-Infrared Spectroscopy with Chemometric Algorithms during Alcohol Precipitation
Source: MDPI journal article supplement (doi:10.3390/molecules28010004), 2022-12-20

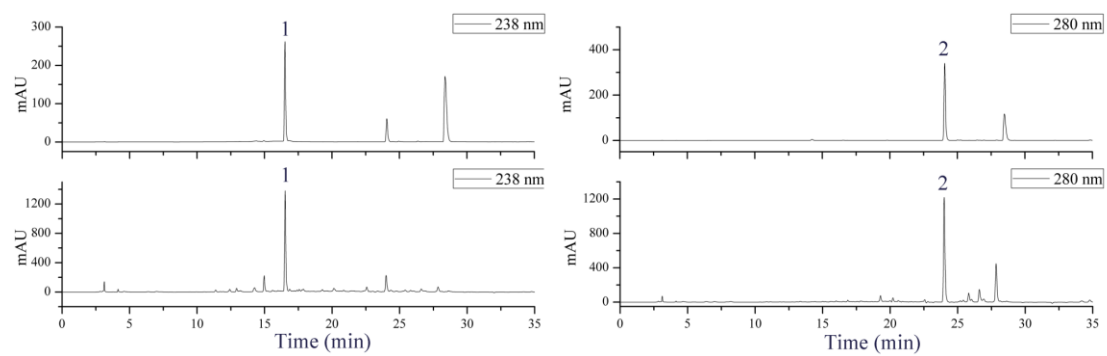

**Figure S1** HPLC chromatograms of standard solution and LOS sample (1. geniposide, 2. baicalin).

Supplement: s1 [file s1]
